# Supplementary material
Source: HighWire-hosted journal article supplement (https://erj.ersjournals.com/highwire/filestream/113112/field_highwire_adjunct_files/5/Supp_table_1.pdf)
Supplement: Supp_table_1.pdf [file Supp_table_1.pdf]

| Mice/treatment |       |       | Mice/treatment      |       |       |
|----------------|-------|-------|---------------------|-------|-------|
|                | Obs 1 | Obs 2 |                     | Obs 1 | Obs 2 |
| WT/saline      |       | 0     | WT/saline/<br>ATK   | 0     | 0     |
|                |       | 0     |                     | 0     | 1     |
|                |       | 0     |                     | 0     | 0     |
|                |       | 0     |                     | 1     | 0     |
|                |       | 0     |                     | 0     | 1     |
|                |       | 0.5   |                     | 1     | 0     |
| Means          | 0.08  | 0.08  | Means               | 0.33  | 0.33  |
| SE             | 0.13  | 0.13  | SE                  | 0.44  | 0.44  |
| WT/LPS         |       | 1     | WT/LPS/ATK          | 0     | 0     |
|                |       | 1     |                     | 1     | 1     |
|                |       | 0     |                     | 0     | 0     |
|                |       | 1     |                     | 1.5   | 1     |
|                |       | 0     |                     | 0     | 1.5   |
|                |       | 1     |                     | 2     | 1     |
| Means          | 0.66  | 0.83  | Means               | 0.75  | 0.75  |
| SE             | 0.44  | 0.83  | SE                  | 0.75  | 0.62  |
| CFTR/saline    |       | 2     | CFTR/saline<br>/ATK | 0     | 0     |
|                |       | 2     |                     | 0     | 1     |
|                |       | 2     |                     | 0     | 0     |
|                |       | 2     |                     | 0.5   | 0     |
|                |       | 1     |                     | 0     | 0.5   |
|                |       | 2     |                     | 1     | 0     |
| Means          | 1.83  | 1.83  | Means               | 0.2   | 0.2   |
| SE             | 0.27  | 0.27  | SE                  | 0.32  | 0.32  |
| CFTR/LPS       |       | 6     | CFTR/LPS/<br>ATK    | 0     | 0     |
|                |       | 4     |                     | 0     | 0     |
|                |       | 5     |                     | 0     | 1     |
|                |       | 5     |                     | 1.5   | 0     |
|                |       | 6     |                     | 0     | 1     |
|                |       | 5     |                     | 1     | 0     |
| Means          | 5.16  | 5.25  | Means               | 0.2   | 0.27  |
| SE             | 0.55  | 0.62  | SE                  | 0.32  | 0.39  |

Mucus scores in CFTR KO vs WT mice : effect of ATK.

The scores were performed by two independent observers (Obs.1 and Obs.2).

Statistical comparisons between groups are indicated in the Figure 1C
